# Supplementary material for: Computational and Rational Design of Single-Chain Antibody against Tick-Borne Encephalitis Virus for Modifying Its Specificity
Source: MDPI journal article supplement (doi:10.3390/v13081494), 2021-07-29
Supplement: s1 [file s1]

## Supplementary materials

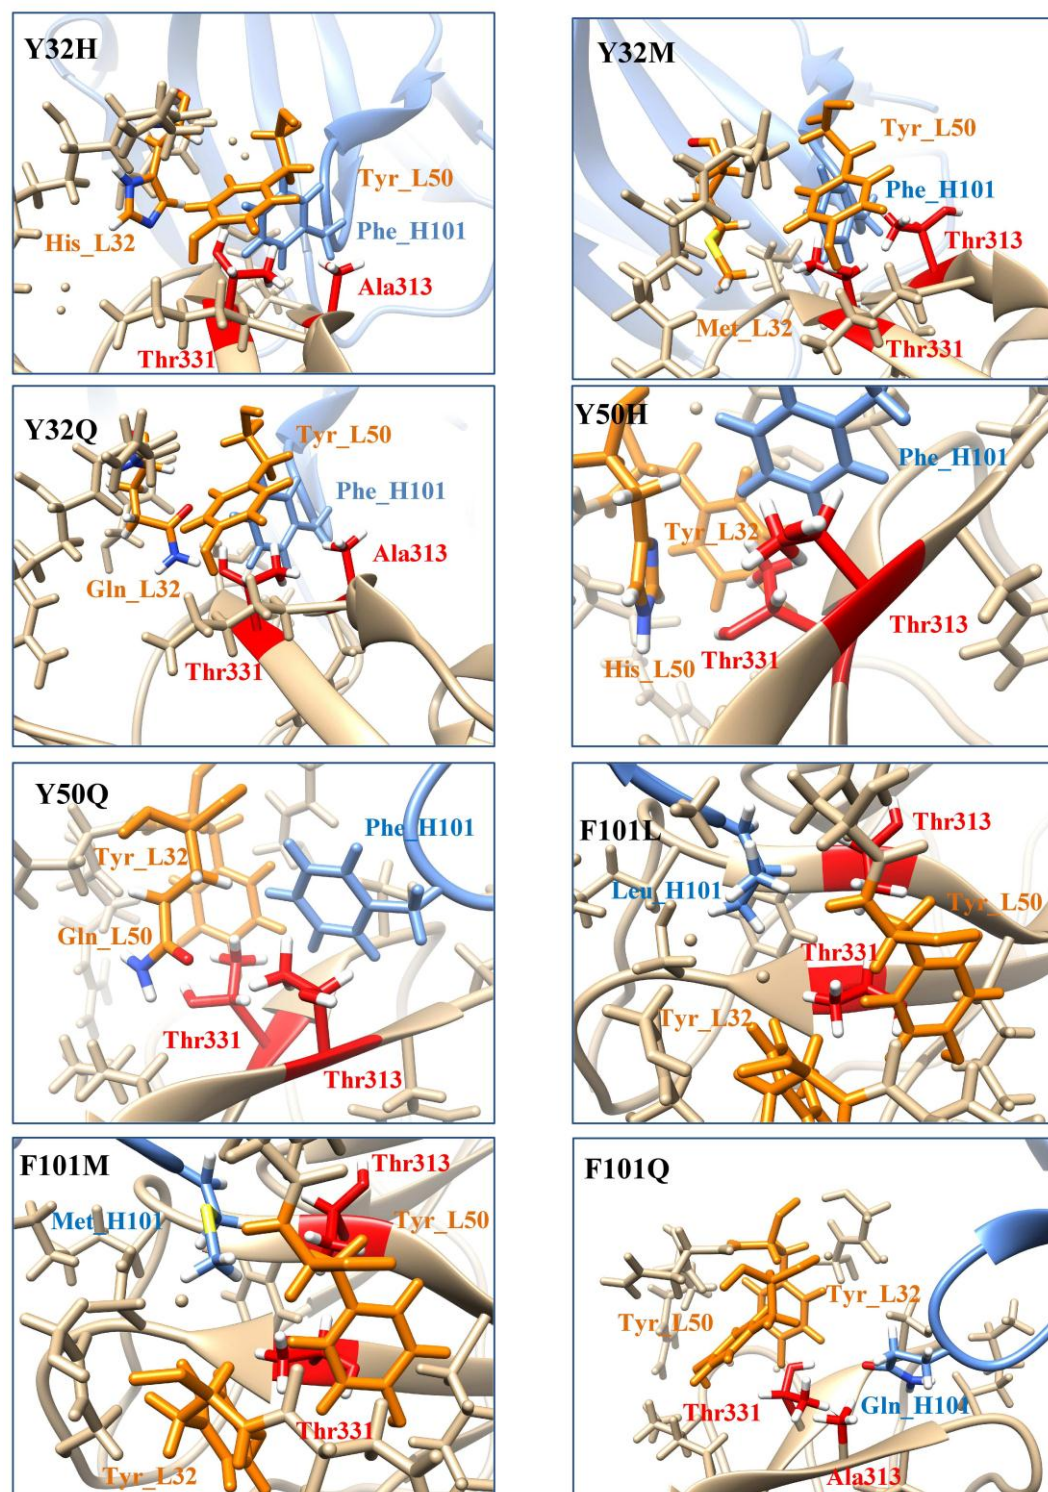

**Figure S1.** Models of complexes for mutant variants of the sc14D5 antibody with the D3\_Eu protein (Y32M, Y50H, Y50Q, F101L, F101M) or D3\_Zau (Y32H, Y32Q, F101Q). The amino acid residues of the light or heavy chain are shown in orange or blue, respectively. Part of the D3\_Sof protein is shown in tan.

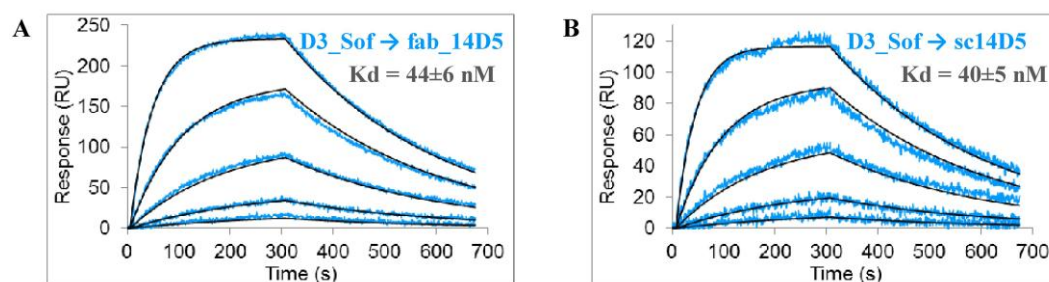

**Figure S2.** Binding of the D3\_Sof protein to the Fab-fragment of the ch14D5 antibody (A) or the single-chain sc14D5 antibody (B). D3 proteins were used as three-fold dilutions starting from 260 nM concentration. Experimental curves are shown in blue, approximations are shown in black.

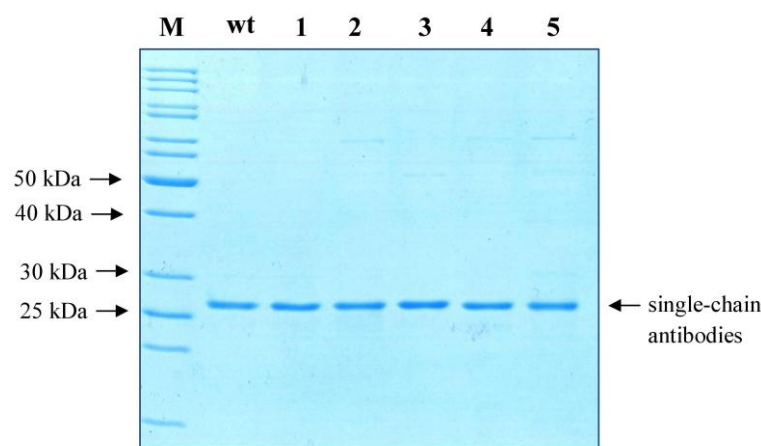

**Figure S3.** Gel electrophoresis of single-chain antibody fragments in 12% polyacrylamide gel containing SDS. Samples were prepared in non-reducing conditions, 1 µg of proteins were used for analysis. Lane “wt” – single-chain antibody sc14D5, lanes 1-5 correspond to single-chain antibodies Y32H, Y32M, Y50H, F101L and F101M. Other antibody samples looked similar. M – Thermo Fisher scientific protein ladder #26614.

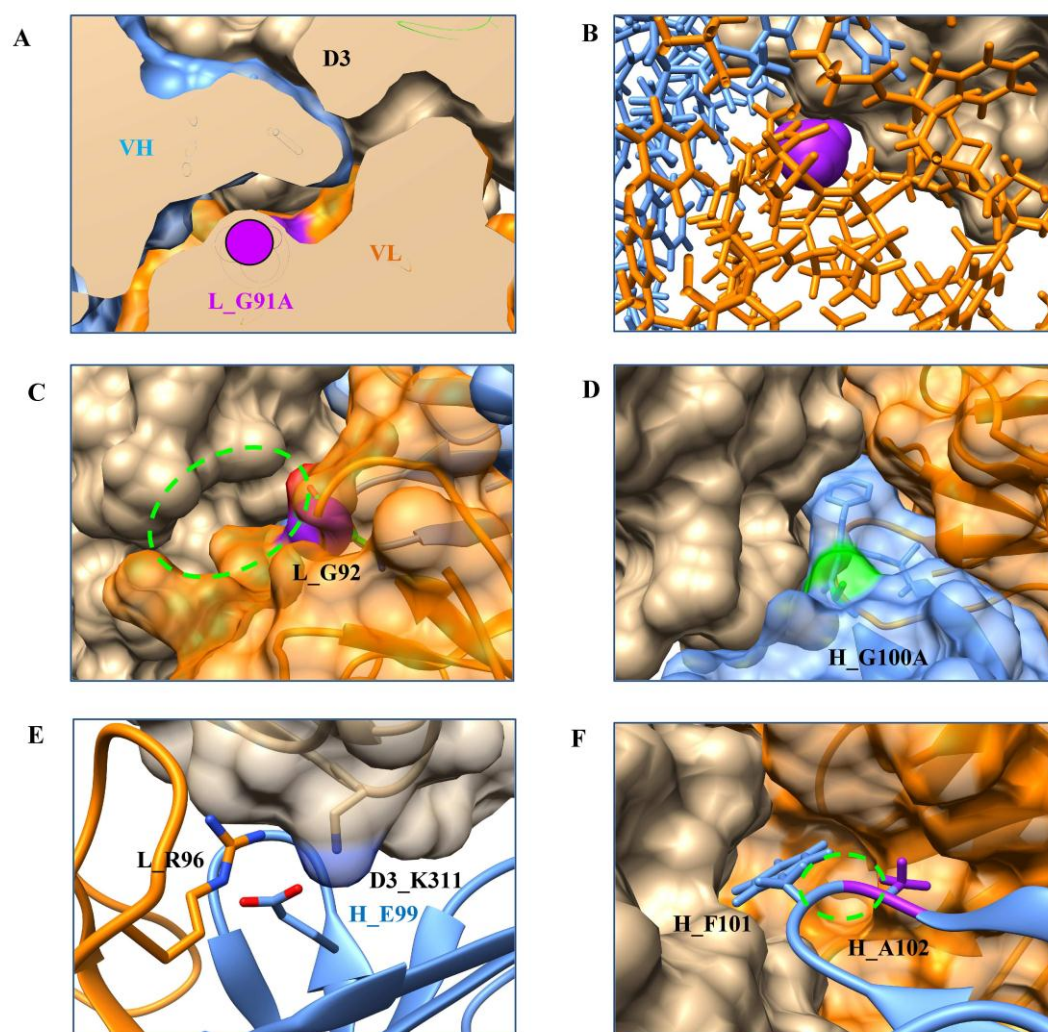

**Figure S4.** Analysis of the positions predicted using the mmCSM-AB method. (A, B) Analysis of the L\_G91 position with introduced alanine mutation. The CH3 group of alanine is shown in purple. (C) Analysis of the L\_G92 position. The C-alpha atom of glycine is shown in purple. The cavity between the VL domain and the D3 protein is indicated by the green outline. (D) Analysis of the H\_G100 position with introduced alanine residue (shown in green), the CH3 group is directed into the cavity. (E) Analysis of the H\_E99 position, the residues involved in the formation of ionic bonds are shown. (F) Analysis of the H\_A102 position. A small cavity is outlined in green. Variable domains of antibody are shown in orange or blue, respectively, D3 domain is shown in tan.



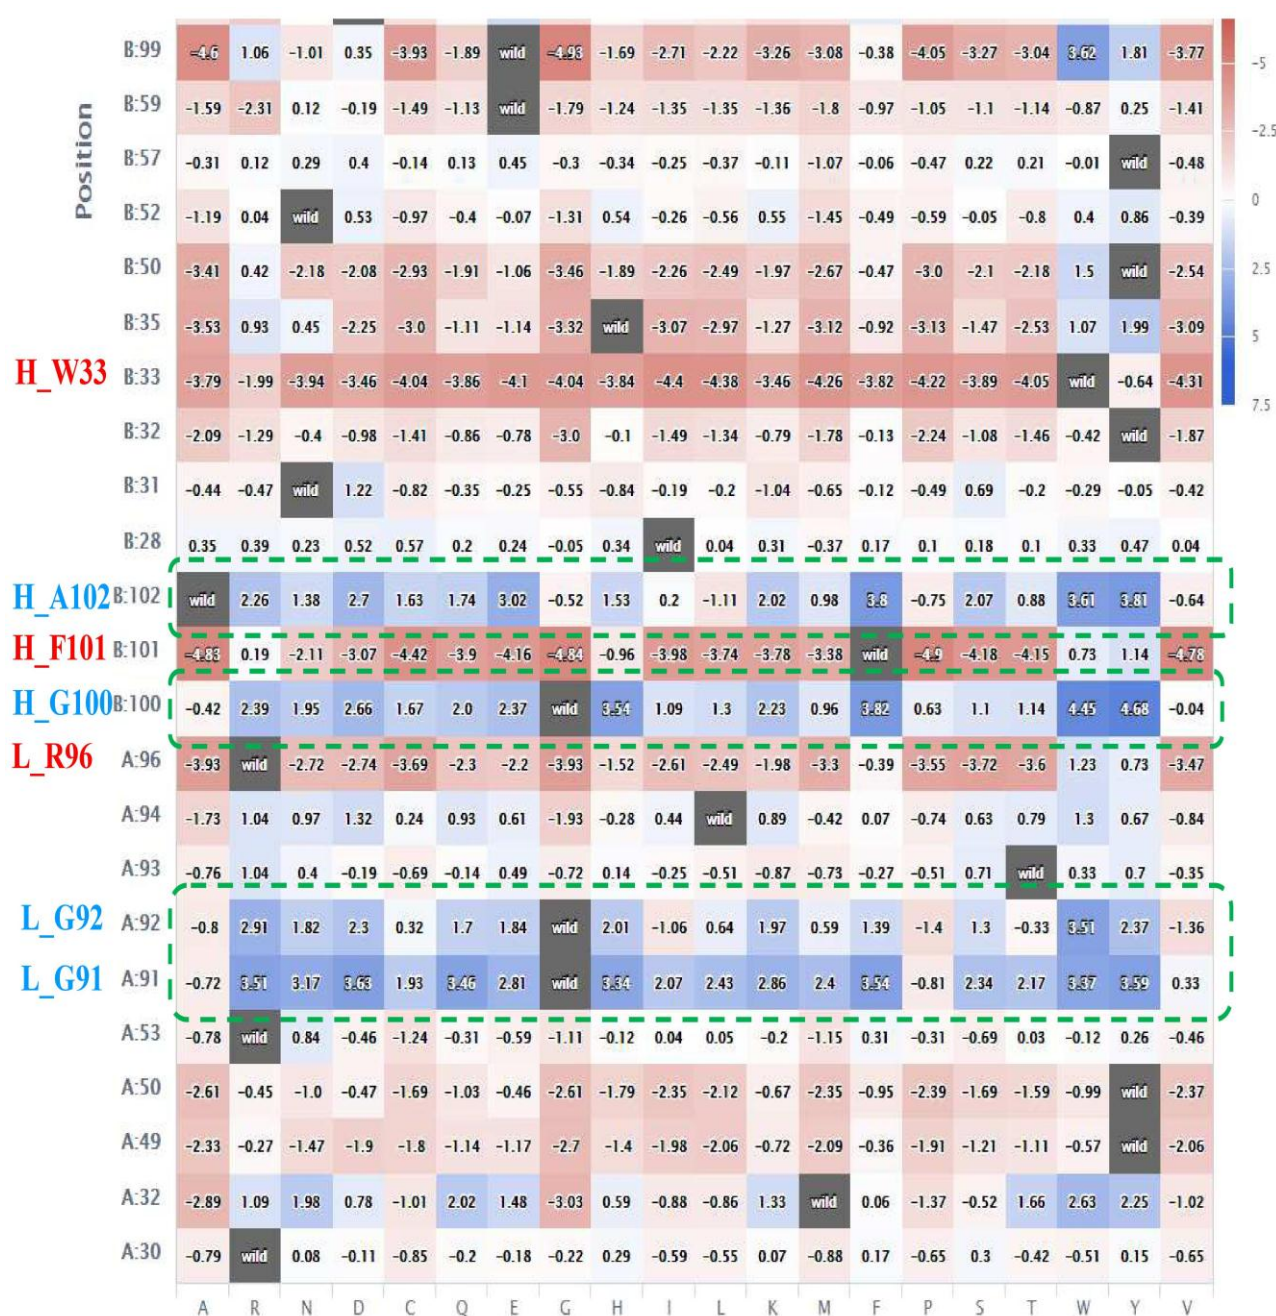

**Figure S5.** Heat map illustrating the effect of substitutions introduced into the Y32M antibody, predicted using the mCSM-AB2 service ([http://biosig.unimelb.edu.au/mcsm\\_ab2/](http://biosig.unimelb.edu.au/mcsm_ab2/)). The most favorable mutations are shown in blue, the least favorable mutations are shown in red. Amino acid residues of the light chain are marked with "A", the residues of the heavy chain of the antibody are marked with "B". The green outline marks the most favorable positions according to the results of the mCSM-AB2 and mmCSM-AB methods.

**Table S1.** Oligonucleotides used in the study.

| <b>Mutation</b>                                       | <b>Oligonucleotide (5'---3')</b>                                                       |
|-------------------------------------------------------|----------------------------------------------------------------------------------------|
| L_Y32H                                                | Y32H_dir: CAGGACATTAGAAATCATTAACTGGTATC<br>Y32H_rev: TTGATACCAGTTTAACTGATTTCTAATGTCC   |
| L_Y32M                                                | Y32M_dir: CAGGACATTAGAAATATGTTAACTGGTATC<br>Y32M_rev: TTGATACCAGTTTAAACATATTCTAATGTCC  |
| L_Y32Q                                                | Y32Q_dir: CAGGACATTAGAAATCAGTTAACTGGTATC<br>Y32Q_rev: TTGATACCAGTTTAACTGATTTCTAATGTCC  |
| L_Y50H                                                | Y50H_dir: AAACCTCTGATCTACCATACATCAAGATTAC<br>Y50H_rev: CTGTAATCTTGATGTATGGTAGATCAGGAG  |
| L_Y50Q                                                | Y50Q_dir: AAACCTCTGATCTACCAGACATCAAGATTAC<br>Y50Q_rev: CTGTAATCTTGATGTCTGGTAGATCAGGAG  |
| H_F101L                                               | F101L_dir: TGTGTAAGAGAGGGACTGGCCCTTGACTAC<br>F101L_rev: CCAGTAGTCAAGGGCCAGTCCCTCTCTTAC |
| H_F101M                                               | F101M_dir: TGTGTAAGAGAGGGAATGGCCCTTGACTAC<br>F101M_rev: CCAGTAGTCAAGGGCCATTCCCTCTCTTAC |
| H_F101Q                                               | F101Q_dir: TGTGTAAGAGAGGGACAGGCCCTTGACTAC<br>F101Q_rev: CCAGTAGTCAAGGGCCTGTCCCTCTCTTAC |
| L_Y32M_G91F                                           | G91F_dir: TGCCAAGAGTTTGGTACGCTTCCTCGG<br>G91F_rev: CCGAGGAAGCGTACCAAACTCTTGGCA         |
| L_Y32M_G91W                                           | G91W_dir: TGCCAAGAGTGGGGTACGCTTCCTCGG<br>G91W_rev: CCGAGGAAGCGTACCCCACTCTTGGCA         |
| L_Y32M_G92E                                           | G92E_dir: TGCCAAGAGGGTGAAACGCTTCCTCGG<br>G92E_rev: CCGAGGAAGCGTTTCACCTCTTGGCA          |
| L_Y32M_G92W                                           | G92W_dir: TGCCAAGAGGGTTGGACGCTTCCTCGG<br>G92W_rev: CCGAGGAAGCGTCCAACCCTCTTGGCA         |
| L_Y32M_G92Y                                           | G92Y_dir: TGCCAAGAGGGTTATACGCTTCCTCGG<br>G92Y_rev: CCGAGGAAGCGTATAACCCTCTTGGCA         |
| H_Y32M_G100W                                          | G100W_dir: TGTGTAAGAGAGTGGTTCGCCCTTGAC<br>G100W_rev: GTCAAGGGCGAACCCTCTCTTACACA        |
| H_Y32M_G100Y                                          | G100Y_dir: TGTGTAAGAGAGTATTTGCCCTTGAC<br>G100Y_rev: GTCAAGGGCGAAATACTCTCTTACACA        |
| H_Y32M_A102Y                                          | A102Y_dir: AGAGAGGGATTCTACCTTGACTACTGG<br>A102Y_rev: CCAGTAGTCAAGGTAGAATCCCTCTCT       |
| Flanking oligonucleotides<br>for insertion into pHEN2 | LMB3_mod_dir: TTCACACAGGAAACAGCTATGACC<br>pHEN_mod_rev: CAGTCTATGCGGCCCATTC            |
